# Supplementary material
Source: bioRxiv or medRxiv preprint supplement (https://www.biorxiv.org/content/biorxiv/early/2020/04/22/2020.04.21.054361/DC1/embed/media-1.pdf)

## Supplemental Information

**Table S1, Related to Figure 1.** Summary characteristics of the Leigh syndrome patient derived fibroblast cell lines including the patient phenotype at diagnosis, the mutations identified, and published literature using the cell line.

**Table S2, Related to Figure 4.** Day 10 LS derived neutralized embryoid bodies relative metabolite abundance for metabolites used in pathway analysis. LC-MS measured metabolite peak areas were normalized to the total ion count (TIC) by sample and fold change was determined by dividing each LS TIC normalized peak area by the control TIC normalized peak area for each metabolite. Metabolites were identified and filtered for pathway analysis using a threshold fold change (FC >5 and <0.4). Fold change values shown are averages for 2 independent runs with ~150 neutralized EBs per run.

**Table S3, Related to Figure 4.** Summary of the metabolic pathways analysis for metabolites enriched in day 10 LS derived neutralized embryoid bodies. Statistical p values from enrichment analysis are adjusted for multiple hypothesis testing. Total: total number of compounds in the pathway. Hits: matched number from the uploaded data. Raw p: original p value calculated from the enrichment analysis. Holm p: p value adjusted by Holm-Bonferroni method. FDR p: adjusted p value using False Discovery Rate. Impact: pathway impact value calculated from pathway topology analysis.

**Figure S1, Related to Figure 2.** Characterization of Leigh syndrome iPSCs. A. Schematic representation of the fibroblast reprogramming protocol. B-C. Pluripotency characterization of the LS iPSCs. Samples were analyzed against samples in a reference data set (The International Stem Cell Initiative, 2018) (B). The distribution of the samples compared with a non-iPSC control shows clustering of the samples in the high pluripotency and low novelty quadrant (C). D. qPCR

for the pluripotency genes *POU5F1* and *NANOG*. E. Karyotype characterization results for LS and control cell lines.

**Figure S2, Related to Figure 3.** Leigh syndrome derived NPCs are multipotent and do not present increased sensitivity to pharmacological stressors. A. Quantification of protein expression of neural markers Pax6, Nestin and Sox2. B. Leigh syndrome NPCs do not show enhanced sensitivity towards different stressors. LS NPCs have similar cell viability compared to control when exposed to the DNA damaging agents etoposide and neocarzinostatin, the mitochondrial toxicant CCCP, and the microtubule destabilizer nocodazole.

**Figure S3, Related to Figure 5.** MT-ATP6/PDH brain organoids display defective differentiation at day 10. A. Brightfield images (4X) of day 10 brain organoids. MT-ATP6/PDH shows disorganized cellular growth that do not resemble neuroepithelial buds. B. Quantification of the defective organoids at day 10 by cell line.

**Figure S4, Related to Figure 7.** Heat map of metabolomic analysis of day 40 organoids. A total of four batches of 40-day organoids per line were analyzed as described in methods. Each column represents a replicate and each row represents a metabolite. Relative abundance is independently scaled by row with higher z scores represented by red color and lower z scores represented by blue color.

| Cell line | Phenotype                                                                                                                                                                        | Mutation                                                                                      | References                                                                                                                                          |
|-----------|----------------------------------------------------------------------------------------------------------------------------------------------------------------------------------|-----------------------------------------------------------------------------------------------|-----------------------------------------------------------------------------------------------------------------------------------------------------|
| GM03672   | 1 y/o female, Caucasian.<br>Developmental regression; microcephalic;<br>elevated blood lactic acid and pyruvate;<br>only affected family member                                  | PDH (E1) LOF<br>Pyruvate dehydrogenase<br>(79delC, Arg27fs)                                   | Hinman et al. 1989;<br>Huh et al. 1990;<br>Johnson et al. 2018                                                                                      |
| GM01503   | 3y/o female, Caucasian.<br>Lactic acidosis, psychomotor delay;<br>sister also affected.<br>Subnormal activation of pyruvate<br>dehydrogenase complex in<br>disrupted fibroblasts | DLD (E3)<br>Dihydrolipoamide<br>dehydrogenase<br>(A100G, Thr34Ala)                            | Cooper et al, 1969;<br>Murphy JV, 1973;<br>Sorbi& Blass, 1982;<br>Hinman et al. 1989;<br>Huh et al. 1990;<br>Vo et al. 2007;<br>Johnson et al. 2018 |
| GM13411   | 8 month old male, Chinese.<br>Lactic acidosis; developmental delay.<br>Hypertrophic cardiomyopathy.<br>Symmetric neural necrosis.<br>Fibroblast: 90% heteroplasmy                | MT-ATP6<br>(T8993G, Leu156Arg)<br>PDH (E1) LOF<br>Pyruvate dehydrogenase<br>(79delC, Arg27fs) | Pastores et al. 1994;<br>Iyer et al.2012;<br>Ma et al. 2014;<br>Galera-Monge et al. 2016;<br>Zheng et al. 2016;<br>Johnson et al. 2018              |

| Query                                 | HMDB                             | PubChem           | KEGG               | PDH/Control | DLD/Control | MT-ATP6-PDH/<br>Control |
|---------------------------------------|----------------------------------|-------------------|--------------------|-------------|-------------|-------------------------|
| 2-Hydroxybutyric acid                 | HMDB0000008                      | 11266             | C05984             | 0.41        | 0.67        | 0.36                    |
| D-2-Hydroxyglutaric acid              | HMDB0000606                      | 439391            | C01087             | 6.79        | 1.18        | 1.08                    |
| 3-Methylguanine/ 7-Methylguanine      | HMDB0001566/<br>HMDB0000897      | 76292/ 11361      | C02230/<br>C02242  | 32.83       | 7.63        | 6.08                    |
| 3-Phosphoglyceric acid                | HMDB0000807                      | 724               | C00597             | 8.94        | 4.58        | 4.16                    |
| Phosphoserine                         | HMDB0000272                      | 68841             | C01005             | 6.83        | 4.76        | 2.88                    |
| p-Hydroxyphenylacetic acid            | HMDB0000020                      | 127               | C00642             | 0.60        | 0.23        | 0.39                    |
| 5-Methylcytosine                      | HMDB0002894                      | 65040             | C02376             | 11.61       | 6.71        | 1.88                    |
| 5'-Methylthioadenosine                | HMDB0001173                      | 439176            | C00170             | 18.81       | 8.50        | 8.87                    |
| 6-Phosphogluconic acid                | HMDB0001316                      | 91493             | C00345             | 26.19       | 9.48        | 4.96                    |
| 6-Phosphonoglucono-D-lactone          | HMDB0001127                      | 439452            | C01236             | 0.00        | 0.00        | 0.00                    |
| Acetoacetic acid                      | HMDB0000060                      | 96                | C00164             | 0.64        | 0.80        | 0.13                    |
| Acetylcholine                         | HMDB0000895                      | 6060              | C01996             | 6.07        | 3.72        | 4.50                    |
| cis-Aconitic acid                     | HMDB0000072                      | 643757            | C00417             | 6.75        | 8.62        | 7.20                    |
| Adenylsuccinic acid                   | HMDB0000536                      | 440122            | C03794             | 13.71       | 11.06       | 5.76                    |
| ADP                                   | HMDB0001341                      | 6022              | C00008             | 7.03        | 4.00        | 3.45                    |
| Agmatine                              | HMDB0001432                      | 199               | C00179             | 8.02        | 0.00        | 16.86                   |
| Oxoglutaric acid (a-KG)               | HMDB0000208                      | 51                | C00026             | 8.20        | 15.06       | 19.39                   |
| L-Alanine                             | HMDB0000161                      | 5950              | C00041/<br>C00133  | 12.70       | 5.25        | 4.19                    |
| Alpha-ketoisovaleric acid             | HMDB0000019                      | 49                | C00141             | 13.96       | 7.30        | 10.47                   |
| Anandamide                            | HMDB0004080                      | 5281969           | C11695             | 29.79       | 1.99        | 2.60                    |
| L-Arginine                            | HMDB0000517                      | 6322              | C02385             | 7.06        | 3.27        | 3.33                    |
| Argininosuccinic acid                 | HMDB0000052                      | 16950             | C03406             | 10.76       | 3.52        | 3.25                    |
| L-Asparagine                          | HMDB0000168                      | 6267              | C16438             | 9.09        | 4.52        | 3.93                    |
| L-Aspartic acid                       | HMDB0000191                      | 5960              | C16433             | 5.81        | 3.83        | 2.03                    |
| Adenosine triphosphate (ATP)          | HMDB0000538                      | 5957              | C00002             | 11.05       | 6.03        | 3.88                    |
| Beta-Alanine                          | HMDB0000056                      | 239               | C00099             | 12.15       | 6.85        | 0.50                    |
| Betaine                               | HMDB0000043                      | 247               | C00719             | 6.74        | 5.60        | 3.57                    |
| Carbamoyl phosphate                   | HMDB0001096                      | 278               | C00169             | 0.00        | 5.91        | 2.29                    |
| L-Carnitine                           | HMDB0000062                      | 2724480           | C00487             | 1.36        | 8.78        | 3.02                    |
| Citric acid                           | HMDB0000094                      | 311               | C00158             | 126.65      | 49.58       | 34.21                   |
| Cytidine monophosphate (CMP)          | HMDB0000095                      | 8117              | C00055             | 5.96        | 4.46        | 4.52                    |
| Creatine                              | HMDB0000064                      | 586               | C00300             | 24.56       | 15.50       | 19.10                   |
| Cytidine triphosphate                 | HMDB0000082                      | 6176              | C00063             | 9.58        | 5.77        | 4.27                    |
| L-Cystathionine                       | HMDB0000099                      | 439258            | C02291             | 11.04       | 5.92        | 4.11                    |
| L-Cysteine                            | HMDB0000574                      | 5862              | C00097             | 16.61       | 3.61        | 8.56                    |
| L-Cystine                             | HMDB0000192                      | 67678             | C00491             | 0.01        | 0.17        | 0.61                    |
| Cytidine                              | HMDB0000089                      | 6253              | C00475             | 13.76       | 4.12        | 4.44                    |
| Cytosine                              | HMDB0000630                      | 597               | C00380             | 28.76       | 7.89        | 5.83                    |
| D-Arabinono-1,4-lactone               | NA                               | NA                | C00652             | 12.31       | 4.88        | 5.36                    |
| dCMP                                  | HMDB0001202                      | 13945             | C00239             | 0.00        | 0.00        | 0.00                    |
| dCTP                                  | HMDB0000998                      | 65091             | C00458             | 25.73       | 10.28       | 0.00                    |
| Deoxyguanosine                        | HMDB0000085                      | 187790            | C00330             | 29.29       | 9.02        | 5.09                    |
| Deoxyinosine                          | HMDB0000071                      | 65058             | C05512             | 49.11       | 14.94       | 6.69                    |
| Deoxyuridine                          | HMDB0000012                      | 13712             | C00526             | 264.71      | 78.97       | 23.73                   |
| Fructose 1,6-bisphosphate/ D-Fructose | HMDB0001058/<br>2,6-bisphosphate | 445557/<br>105021 | C00354 /<br>C00665 | 8.22        | 6.10        | 5.02                    |
| Fructose 1-phosphate                  | HMDB0001076                      | 10400369          | C01094             | 12.62       | 7.55        | 8.20                    |
| Galactonic acid                       | HMDB0000565                      | 128869            | C00880             | 10.39       | 6.53        | 4.31                    |
| dGDP                                  | HMDB0000960                      | 439220            | C00361             | 19.75       | 8.44        | 4.62                    |
| Glucose 6-phosphate                   | HMDB0001401                      | 5958              | C00092             | 6.68        | 3.81        | 4.19                    |
| D-Glyceraldehyde 3-phosphate/         | HMDB0001112/                     | 729/              | C00118 /           | 7.65        | 4.01        | 3.60                    |
| Dihydroxyacetone phosphate            | HMDB0001473                      | 668               | C00111             |             |             |                         |
| 4,5-Dihydroorotic acid                | HMDB0000528                      | 648               | C00337             | 6.70        | 4.34        | 3.98                    |
| DL-Dopa                               | HMDB0000609                      | 836               | C00355             | 0.16        | 1.19        | 0.46                    |
| 3,4-Dihydroxyphenylglycol (DOPEG)     | HMDB0000318                      | 91528             | C05576             | 0.11        | 0.64        | 0.52                    |
| Hydroxytyrosol (DOPET)                | HMDB0005784                      | 82755             | NA                 | 0.46        | 0.72        | 0.43                    |
| D-Sedoheptulose 7-phosphate           | HMDB0001068                      | 22833559          | C00281             | 14.26       | 6.50        | 4.82                    |
| Fructose 6-phosphate                  | HMDB0000124                      | 69507             | C00085             | 9.73        | 4.43        | 3.96                    |
| Fumaric acid                          | HMDB0000134                      | 444972            | C00122             | 5.39        | 4.16        | 3.13                    |
| GDP-L-fucose                          | HMDB0001095                      | 439211            | C00325             | 14.13       | 5.67        | 6.02                    |
| Glucosamine 6-phosphate               | HMDB0001254                      | 439217            | C00352             | 13.26       | 6.49        | 7.38                    |
| L-Glutamine                           | HMDB0000641                      | 5961              | C00303             | 10.30       | 4.88        | 4.37                    |
| L-Glutamic acid                       | HMDB0000148                      | 33032             | C00302             | 6.65        | 3.18        | 2.72                    |
| Glutathione                           | HMDB0000125                      | 124886            | C02471             | 59.41       | 23.87       | 28.72                   |
| Oxidized glutathione                  | HMDB0003337                      | 975               | C00127             | 5.16        | 3.35        | 2.59                    |
| Glycerol 3-phosphate                  | HMDB0000126                      | 439162            | C00093             | 9.59        | 3.84        | 3.86                    |
| Glycine                               | HMDB0000123                      | 750               | C00037             | 5.05        | 4.19        | 3.23                    |
| Guanosine monophosphate (GMP)         | HMDB0001397                      | 6804              | C00144             | 6.51        | 2.92        | 2.63                    |
| Guanosine triphosphate (GTP)          | HMDB0001273                      | 6830              | C00044             | 12.01       | 5.85        | 4.38                    |
| Guanine                               | HMDB0000132                      | 764               | C00242             | 15.87       | 5.37        | 3.29                    |
| Guanosine                             | HMDB0000133                      | 6802              | C00387             | 8.15        | 3.86        | 2.18                    |
| L-Gulonolactone                       | HMDB0003466                      | 439373            | C01040             | 1.29        | 0.34        | 1.09                    |
| L-Homoserine                          | HMDB0000719                      | 12647             | C00263             | 4.85        | 2.84        | 2.33                    |
| Iminodiacetic acid                    | HMDB0011753                      | 8897              | C19911             | 14.77       | 4.33        | 3.91                    |
| Imidazoleacetic acid                  | HMDB0002024                      | 96215             | C02835             | 7.21        | 2.50        | 2.65                    |
| Inosinic acid (IMP)                   | HMDB0000175                      | 8582              | C00130             | 8.83        | 4.42        | 4.41                    |
| Itaconic acid                         | HMDB0002092                      | 811               | C00490             | 9.96        | 3.81        | 4.44                    |

|                                                                                    |                             |                  |                   |       |       |       |
|------------------------------------------------------------------------------------|-----------------------------|------------------|-------------------|-------|-------|-------|
| L-Lysine                                                                           | HMDB0000182                 | 5962             | C00047/<br>C00739 | 7.95  | 2.62  | 2.84  |
| Maleic acid                                                                        | HMDB0000176                 | 444972           | C01384            | 18.82 | 5.87  | 14.75 |
| Malic acid                                                                         | HMDB0000744                 | 525              | C00711            | 5.16  | 3.09  | 2.09  |
| L-Methionine                                                                       | HMDB0000696                 | 6137             | C00073            | 7.27  | 3.68  | 4.27  |
| N1-Acetylspermidine                                                                | HMDB0001276                 | 496              | C00612/<br>C01029 | 1.04  | 1.35  | 7.34  |
| N-Acetyl-L-aspartic acid                                                           | HMDB0000812                 | 65065            | C01042            | 8.84  | 4.17  | 5.22  |
| N-Acetylaspartylglutamic acid                                                      | HMDB0001067                 | 5255             | C12270            | 12.24 | 5.66  | 7.83  |
| N-acetyl-b-alanine                                                                 | NA                          | NA               | C01073            | 3.99  | 5.66  | 0.91  |
| N-Acetyl-D-Glucosamine 6-Phosphate                                                 | HMDB0001062                 | 440996           | C04501/<br>C00357 | 10.29 | 5.01  | 3.75  |
| NAD+                                                                               | HMDB0000902                 | 5893             | C00003            | 7.43  | 3.60  | 3.18  |
| NADP+                                                                              | HMDB0000217                 | 5886             | C00006            | 7.75  | 4.09  | 3.32  |
| Ureidosuccinic acid                                                                | HMDB0000828                 | 93072            | C00438            | 7.53  | 5.11  | 3.97  |
| Niacinamide                                                                        | HMDB0001406                 | 936              | C00153            | 8.25  | 3.05  | 3.74  |
| Norepinephrine                                                                     | HMDB0000216                 | 439260           | C00547            | 0.54  | 0.74  | 1.33  |
| Ornithine                                                                          | HMDB0000214                 | 6262             | C00077            | 11.26 | 3.69  | 3.88  |
| Phosphocreatine                                                                    | HMDB0001511                 | 587              | C02305            | 14.01 | 9.17  | 5.58  |
| Phosphoenolpyruvic acid                                                            | HMDB0000263                 | 1005             | C00074            | 28.03 | 3.97  | 3.85  |
| Phosphorylcholine                                                                  | HMDB0001565                 | 8691             | C00588            | 16.04 | 6.46  | 7.14  |
| Pseudouridine                                                                      | HMDB0000767                 | 15047            | C02067            | 7.12  | 3.12  | 2.07  |
| Putrescine                                                                         | HMDB0001414                 | 1045             | C02896            | 0.95  | 0.53  | 0.20  |
| Pyruvic acid                                                                       | HMDB0000243                 | 1060             | C00022            | 12.46 | 2.20  | 5.47  |
| D-Ribulose 5-phosphate                                                             | HMDB0000618                 | 439184           | C00199            | 8.64  | 4.76  | 4.06  |
| S-Adenosylmethionine                                                               | HMDB0001185                 | 16757548         | C00019            | 5.75  | 4.54  | 2.92  |
| L-Serine                                                                           | HMDB0000187                 | 5951             | C00716            | 12.90 | 4.78  | 3.57  |
| Thymidine                                                                          | HMDB0000273                 | 5789             | C00214            | 39.07 | 10.42 | 7.04  |
| Uridine 5'-diphosphate (UDP)                                                       | HMDB0000295                 | 6031             | C00015            | 10.94 | 5.82  | 4.69  |
| Uridine diphosphate glucose                                                        | HMDB0000286                 | 53477679         | C00029            | 9.60  | 4.82  | 3.14  |
| Uridine diphosphate-N-acetylgalactosamine/ Uridine diphosphate-N-acetylglucosamine | HMDB0000304/<br>HMDB0000290 | 1167/<br>9547196 | C00203/<br>C00043 | 8.73  | 4.87  | 3.37  |
| Uridine                                                                            | HMDB0000296                 | 6029             | C00299            | 5.11  | 2.47  | 1.44  |
| Uridine triphosphate (UTP)                                                         | HMDB0000285                 | 6133             | C00075            | 14.49 | 7.88  | 5.13  |

Supplemental Table 3

| Pathway                                         | Hits | Total | Expected | Raw p    | -LOG(p)  | Holm adjust | FDR      | Impact  |
|-------------------------------------------------|------|-------|----------|----------|----------|-------------|----------|---------|
| Alanine, aspartate and glutamate metabolism     | 16   | 28    | 1.8968   | 9.88E-13 | 27.643   | 8.30E-11    | 8.30E-11 | 0.76282 |
| Synthesis and degradation of ketone bodies      | 1    | 5     | 0.33871  | 0.29616  | 1.2169   | 1           | 0.85783  | 0.6     |
| Arginine biosynthesis                           | 9    | 14    | 0.94839  | 3.24E-08 | 17.244   | 2.69E-06    | 1.36E-06 | 0.5736  |
| Glycine, serine and threonine metabolism        | 8    | 33    | 2.2355   | 0.001137 | 6.7797   | 0.088659    | 0.01364  | 0.55868 |
| D-Glutamine and D-glutamate metabolism          | 3    | 6     | 0.40645  | 0.005201 | 5.259    | 0.38485     | 0.036405 | 0.5     |
| Cysteine and methionine metabolism              | 9    | 33    | 2.2355   | 0.000209 | 8.4735   | 0.016923    | 0.003721 | 0.47436 |
| Nicotinate and nicotinamide metabolism          | 4    | 15    | 1.0161   | 0.015176 | 4.188    | 1           | 0.091058 | 0.42895 |
| beta-Alanine metabolism                         | 2    | 21    | 1.4226   | 0.42186  | 0.86309  | 1           | 1        | 0.39925 |
| Pyrimidine metabolism                           | 14   | 39    | 2.6419   | 6.64E-08 | 16.527   | 5.45E-06    | 1.86E-06 | 0.32533 |
| Arginine and proline metabolism                 | 8    | 38    | 2.5742   | 0.00301  | 5.806    | 0.22873     | 0.028089 | 0.28068 |
| Citrate cycle (TCA cycle)                       | 6    | 20    | 1.3548   | 0.001488 | 6.5105   | 0.11456     | 0.015622 | 0.27512 |
| Pentose phosphate pathway                       | 3    | 22    | 1.4903   | 0.18299  | 1.6984   | 1           | 0.61483  | 0.27226 |
| Purine metabolism                               | 12   | 65    | 4.4032   | 0.000959 | 6.9499   | 0.075743    | 0.013423 | 0.27171 |
| Tyrosine metabolism                             | 7    | 42    | 2.8452   | 0.02008  | 3.908    | 1           | 0.11245  | 0.2369  |
| Pyruvate metabolism                             | 3    | 22    | 1.4903   | 0.18299  | 1.6984   | 1           | 0.61483  | 0.20684 |
| Glycolysis / Gluconeogenesis                    | 3    | 26    | 1.7613   | 0.25592  | 1.3629   | 1           | 0.7962   | 0.20594 |
| Glyoxylate and dicarboxylate metabolism         | 7    | 32    | 2.1677   | 0.004395 | 5.4272   | 0.32966     | 0.036405 | 0.20371 |
| Amino sugar and nucleotide sugar metabolism     | 6    | 37    | 2.5065   | 0.034767 | 3.3591   | 1           | 0.17272  | 0.19203 |
| Aminoacyl-tRNA biosynthesis                     | 11   | 48    | 3.2516   | 0.000221 | 8.4152   | 0.017718    | 0.003721 | 0.16667 |
| Starch and sucrose metabolism                   | 3    | 18    | 1.2194   | 0.11742  | 2.142    | 1           | 0.44831  | 0.16651 |
| Glutathione metabolism                          | 6    | 28    | 1.8968   | 0.00926  | 4.6821   | 0.66671     | 0.059833 | 0.1406  |
| Butanoate metabolism                            | 3    | 15    | 1.0161   | 0.075729 | 2.5806   | 1           | 0.3348   | 0.11111 |
| Glycerophospholipid metabolism                  | 4    | 36    | 2.4387   | 0.22346  | 1.4985   | 1           | 0.72196  | 0.10926 |
| Fructose and mannose metabolism                 | 4    | 20    | 1.3548   | 0.041479 | 3.1826   | 1           | 0.19357  | 0.09559 |
| Folate biosynthesis                             | 1    | 27    | 1.829    | 0.85201  | 0.16016  | 1           | 1        | 0.09111 |
| Pentose and glucuronate interconversions        | 2    | 18    | 1.2194   | 0.34738  | 1.0573   | 1           | 0.97267  | 0.07812 |
| Glycerolipid metabolism                         | 2    | 16    | 1.0839   | 0.29605  | 1.2172   | 1           | 0.85783  | 0.04361 |
| Pantothenate and CoA biosynthesis               | 4    | 19    | 1.2871   | 0.034955 | 3.3537   | 1           | 0.17272  | 0.02143 |
| Valine, leucine and isoleucine degradation      | 2    | 40    | 2.7097   | 0.76775  | 0.26429  | 1           | 1        | 0.01084 |
| Primary bile acid biosynthesis                  | 1    | 46    | 3.1161   | 0.96223  | 0.038502 | 1           | 1        | 0.00758 |
| Galactose metabolism                            | 1    | 27    | 1.829    | 0.85201  | 0.16016  | 1           | 1        | 0.00228 |
| Nitrogen metabolism                             | 3    | 6     | 0.40645  | 0.005201 | 5.259    | 0.38485     | 0.036405 | 0       |
| Histidine metabolism                            | 3    | 16    | 1.0839   | 0.088774 | 2.4217   | 1           | 0.37285  | 0       |
| Ascorbate and aldarate metabolism               | 2    | 8     | 0.54194  | 0.097365 | 2.3293   | 1           | 0.38946  | 0       |
| Neomycin, kanamycin and gentamicin biosynthesis | 1    | 2     | 0.13548  | 0.13094  | 2.033    | 1           | 0.4782   | 0       |
| Thiamine metabolism                             | 1    | 7     | 0.47419  | 0.3886   | 0.9452   | 1           | 1        | 0       |
| Valine, leucine and isoleucine biosynthesis     | 1    | 8     | 0.54194  | 0.43021  | 0.84349  | 1           | 1        | 0       |
| Taurine and hypotaurine metabolism              | 1    | 8     | 0.54194  | 0.43021  | 0.84349  | 1           | 1        | 0       |
| Propanoate metabolism                           | 2    | 23    | 1.5581   | 0.46908  | 0.75698  | 1           | 1        | 0       |
| Biotin metabolism                               | 1    | 10    | 0.67742  | 0.50519  | 0.68283  | 1           | 1        | 0       |
| Inositol phosphate metabolism                   | 2    | 30    | 2.0323   | 0.61489  | 0.48631  | 1           | 1        | 0       |
| Porphyrin and chlorophyll metabolism            | 2    | 30    | 2.0323   | 0.61489  | 0.48631  | 1           | 1        | 0       |
| Mannose type O-glycan biosynthesis              | 1    | 17    | 1.1516   | 0.69847  | 0.35886  | 1           | 1        | 0       |
| Selenocompound metabolism                       | 1    | 20    | 1.3548   | 0.75632  | 0.27929  | 1           | 1        | 0       |
| Sphingolipid metabolism                         | 1    | 21    | 1.4226   | 0.77304  | 0.25742  | 1           | 1        | 0       |
| Lysine degradation                              | 1    | 25    | 1.6935   | 0.8293   | 0.18717  | 1           | 1        | 0       |

**A**

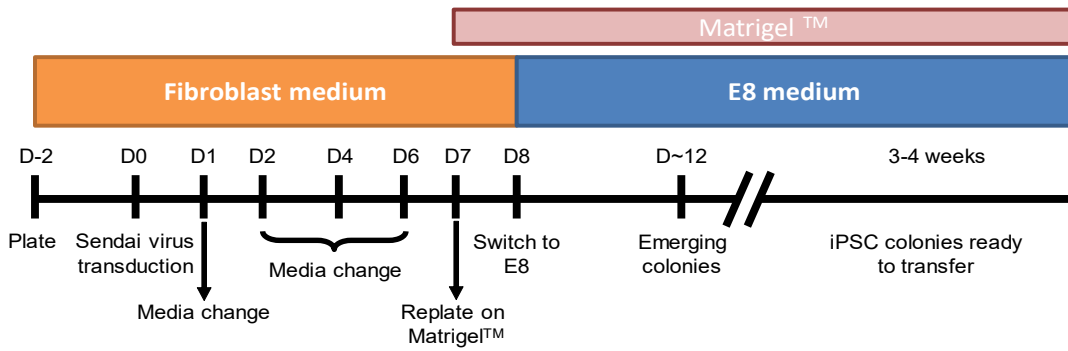

**B**

| Sample           | Pluritest Result | Pluricor | NovelCor |
|------------------|------------------|----------|----------|
| Control          | Pass             | 38.62112 | 1.61562  |
| PDH              | Pass             | 37.78063 | 1.547368 |
| DLD              | Pass             | 36.43402 | 1.626429 |
| MT-ATP6/<br>PDH  | Pass             | 36.21865 | 1.509551 |
| Non iPSC control | Fail             | -48.9629 | 2.790166 |

**C**

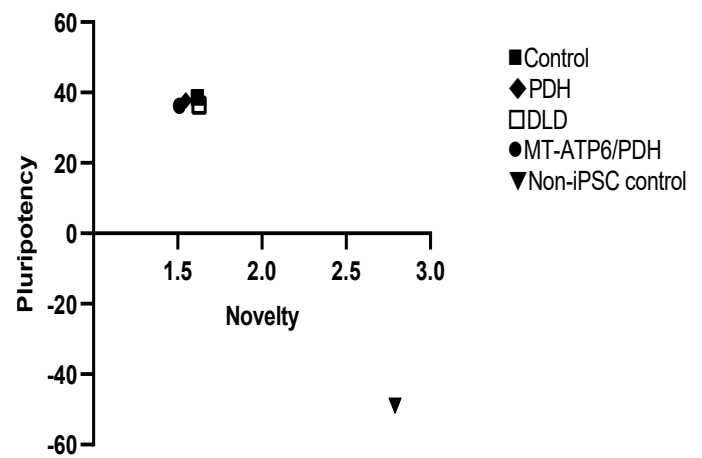

**D**

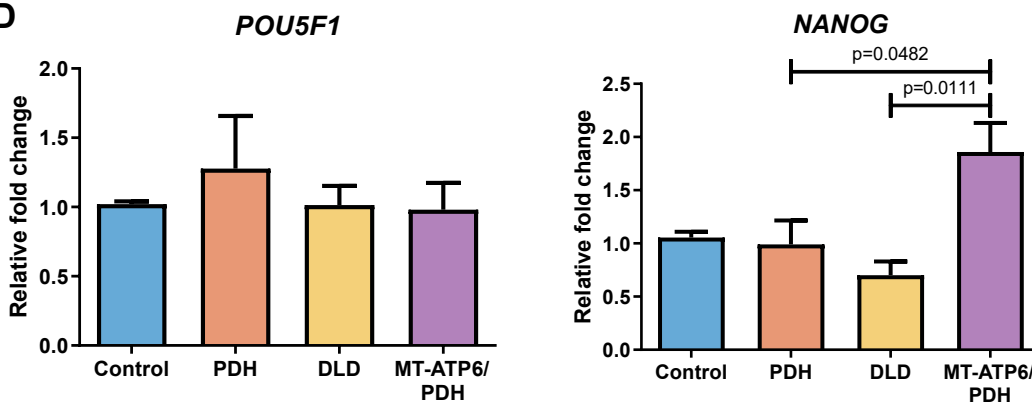

**E**

| Sample      | Karyotype |
|-------------|-----------|
| Control     | Normal    |
| MT-ATP6/PDH | Normal    |
| PDH         | Normal    |
| DLD         | Normal    |

A

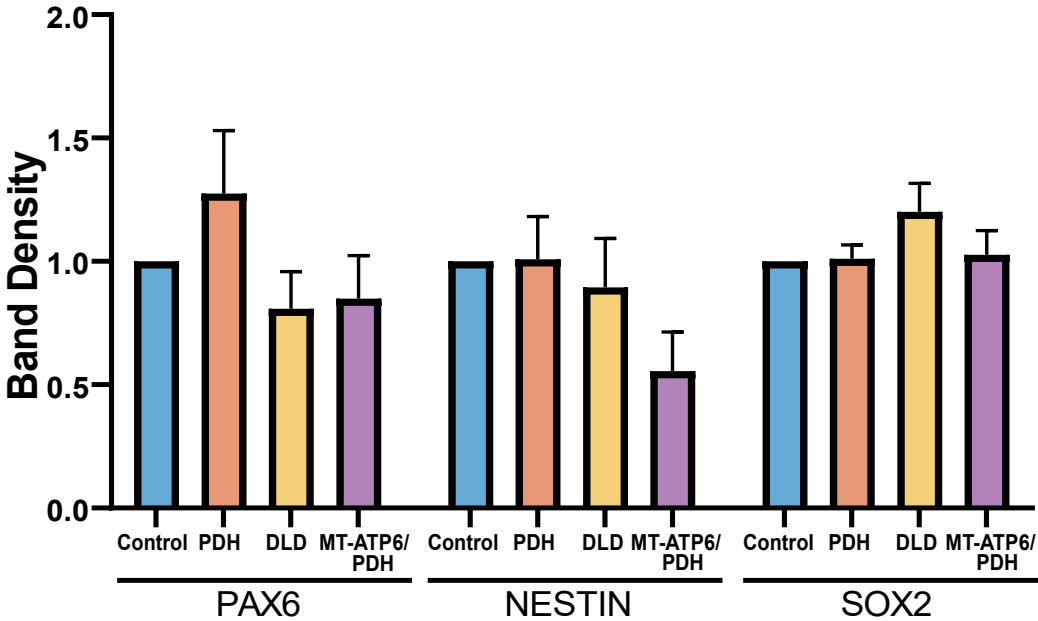

B

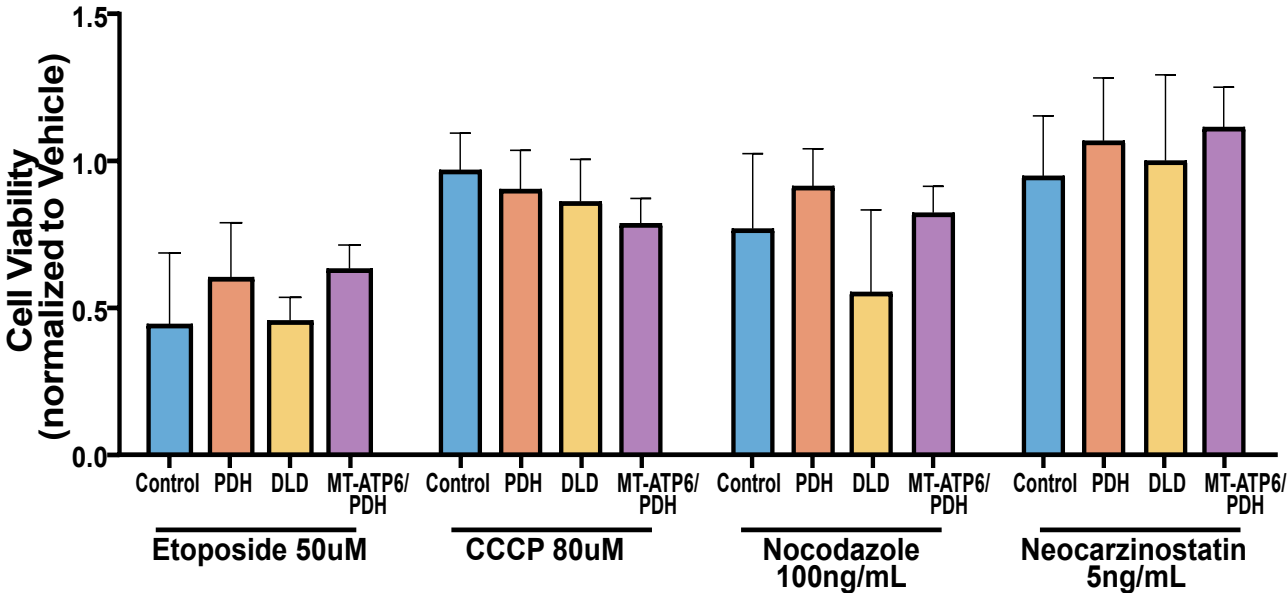



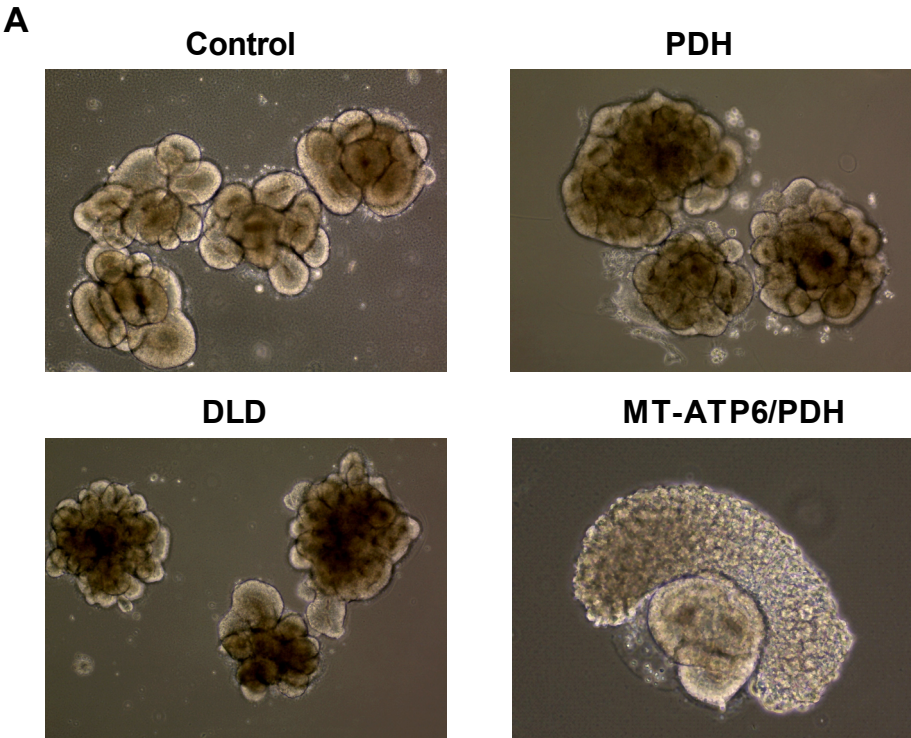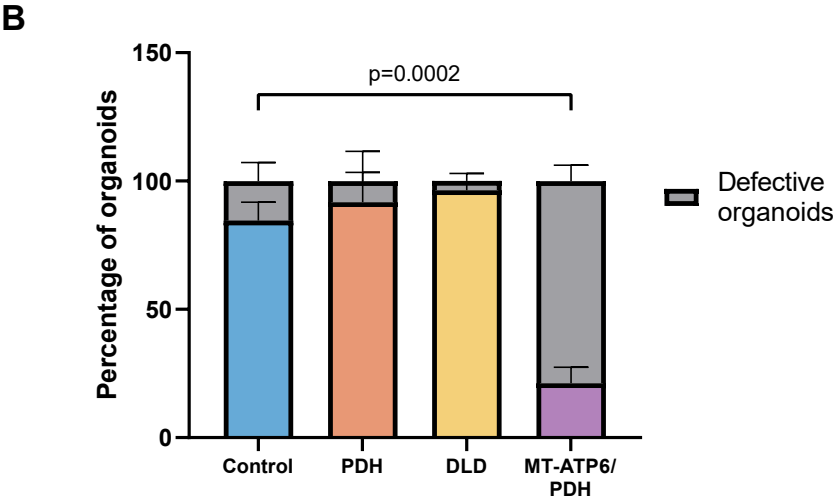

Supplement: Supplementary file [file media-1.pdf]
